# Supplementary material for: Dynamics of Endophytic Fungal Communities Associated with Cultivated Medicinal Plants in Farmland Ecosystem
Source: MDPI journal article supplement (doi:10.3390/jof9121165), 2023-12-04
Supplement: s1 [file s1]

**Table S1.** Meteorological data of Anguo City, Hebei Province.

|                  | Average Minimum Temperature (°C) | Average Maximum Temperature (°C) | Average Humidity (%) | Average Precipitation (mm) |
|------------------|----------------------------------|----------------------------------|----------------------|----------------------------|
| In May 2021      | 13                               | 27                               | 54                   | 20.3                       |
| In June 2021     | 19                               | 31                               | 63                   | 25.5                       |
| In October 2021  | 6                                | 18                               | 79                   | 12.2                       |
| In November 2021 | 0                                | 12                               | 67                   | 6.1                        |

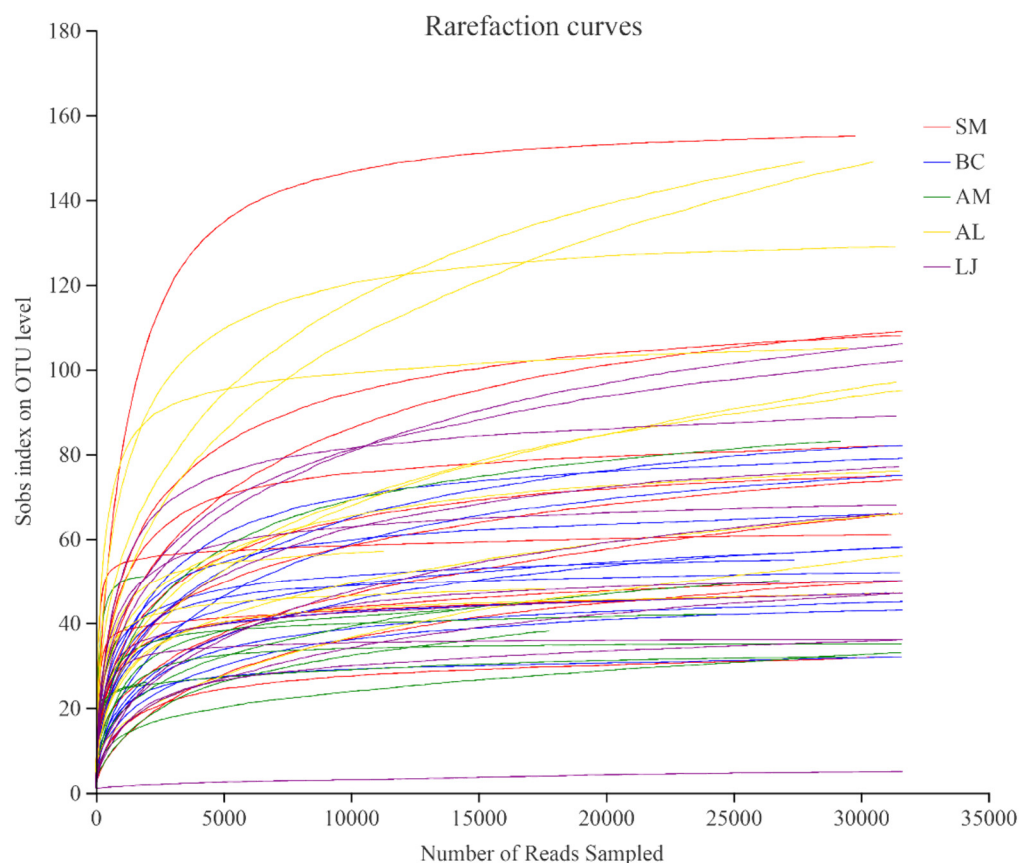

**Figure S1.** Rarefaction curves for the observed endophytic fungal operational taxonomic units (OTUs). Note: rarefaction curves were assembled showing the number of OTUs, as defined at the 97% sequence similarity cut-off in MOTHUR, relative to the number of total sequences. Abbreviations—SM: *Salvia miltiorrhiza*; BC: *Bupleurum chinense*; AM: *Astragalus membranaceus*; AL: *Atractylodes lancea*; LJ: *Lonicera japonica*.

**Table S2.** The ten keystone species in the fungal networks for each plant tissue's niches and seasons.

|      | Order                          | Genus              | OTU  | Degree | +  | – | Abundance (%) |
|------|--------------------------------|--------------------|------|--------|----|---|---------------|
| Root | Glomerales                     | <i>Glomus</i>      | 301  | 14     | 14 | 0 | 0.0009        |
|      | Saccharomycetales              | <i>Dipodascus</i>  | 564  | 14     | 5  | 9 | 0.0012        |
|      | Glomerales                     | unclassified       | 298  | 11     | 11 | 0 | 0.0040        |
|      | Glomerales                     | unclassified       | 335  | 11     | 11 | 0 | 0.0017        |
|      | Glomerales                     | <i>Rhizophagus</i> | 562  | 11     | 11 | 0 | 0.0083        |
|      | Glomerales                     | unclassified       | 272  | 10     | 10 | 0 | 0.0010        |
|      | O_unclassified_p_Glomeromycota | unclassified       | 293  | 10     | 10 | 0 | 0.0015        |
|      | Glomerales                     | <i>Rhizophagus</i> | 282  | 10     | 10 | 0 | 0.0014        |
|      | Hypocreales                    | unclassified       | 61   | 9      | 7  | 2 | 0.0012        |
|      | Hypocreales                    | <i>Gibberella</i>  | 1154 | 9      | 7  | 2 | 0.0666        |

|          |                                |                          |      |    |    |    |        |
|----------|--------------------------------|--------------------------|------|----|----|----|--------|
| Leaf     | Pleosporales                   | <i>Phaeosphaeria</i>     | 252  | 40 | 35 | 5  | 0.2738 |
|          | Pleosporales                   | <i>Setophaeosphaeria</i> | 788  | 39 | 34 | 5  | 0.9333 |
|          | Capnodiales                    | unclassified             | 870  | 35 | 33 | 2  | 2.2505 |
|          | Capnodiales                    | unclassified             | 868  | 35 | 35 | 0  | 0.1017 |
|          | Capnodiales                    | <i>Mycosphaerella</i>    | 909  | 35 | 35 | 0  | 0.0624 |
|          | Capnodiales                    | unclassified             | 857  | 34 | 34 | 0  | 0.0401 |
|          | Capnodiales                    | unclassified             | 763  | 34 | 33 | 1  | 0.1666 |
|          | Pleosporales                   | unclassified             | 883  | 34 | 30 | 4  | 0.1123 |
|          | Tremellales                    | <i>Hannaella</i>         | 798  | 34 | 31 | 3  | 0.0850 |
|          | Pleosporales                   | <i>Coniothyrium</i>      | 666  | 34 | 30 | 4  | 0.0801 |
| June     | Glomerellales                  | unclassified             | 165  | 27 | 23 | 4  | 0.0034 |
|          | Hypocreales                    | <i>Neocosmospora</i>     | 25   | 21 | 16 | 5  | 0.0133 |
|          | Cystofilobasidiales            | <i>Tausonia</i>          | 175  | 20 | 18 | 2  | 0.0032 |
|          | Hypocreales                    | <i>Neocosmospora</i>     | 52   | 19 | 16 | 3  | 0.0037 |
|          | Hypocreales                    | <i>Fusarium</i>          | 114  | 19 | 14 | 5  | 0.0002 |
|          | Hypocreales                    | <i>Dactylonectria</i>    | 64   | 17 | 15 | 2  | 0.0123 |
|          | Pleosporales                   | unclassified             | 172  | 17 | 17 | 0  | 0.0024 |
|          | Auriculariales                 | <i>Oliveonia</i>         | 90   | 16 | 16 | 0  | 0.0003 |
|          | Eurotiales                     | <i>Aspergillus</i>       | 1220 | 16 | 4  | 12 | 0.0018 |
|          | Hypocreales                    | <i>Gibberella</i>        | 82   | 15 | 11 | 4  | 0.0161 |
| November | Glomerales                     | <i>Glomus</i>            | 368  | 17 | 17 | 0  | 0.0004 |
|          | Capnodiales                    | unclassified             | 868  | 17 | 16 | 1  | 0.1017 |
|          | Capnodiales                    | <i>Cercospora</i>        | 885  | 16 | 16 | 0  | 0.0394 |
|          | Glomerales                     | <i>Rhizophagus</i>       | 282  | 16 | 16 | 0  | 0.0008 |
|          | Glomerales                     | <i>Glomus</i>            | 301  | 15 | 15 | 0  | 0.0005 |
|          | Capnodiales                    | unclassified             | 763  | 15 | 14 | 1  | 0.1666 |
|          | Venturiales                    | <i>Ochroconis</i>        | 786  | 14 | 14 | 0  | 0.0034 |
|          | Glomerales                     | <i>Rhizophagus</i>       | 562  | 14 | 14 | 0  | 0.0046 |
|          | Capnodiales                    | <i>Sphaerulina</i>       | 911  | 14 | 14 | 0  | 0.0005 |
|          | Glomerales                     | <i>Glomus</i>            | 369  | 14 | 14 | 0  | 0.0006 |
| Total    | Capnodiales                    | unclassified             | 763  | 11 | 11 | 0  | 0.0007 |
|          | Helotiales                     | <i>Articulospora</i>     | 835  | 11 | 11 | 0  | 0.0012 |
|          | Capnodiales                    | unclassified             | 721  | 10 | 11 | 0  | 0.0246 |
|          | Venturiales                    | <i>Ochroconis</i>        | 786  | 10 | 10 | 0  | 0.0034 |
|          | Hypocreales                    | <i>Dactylonectria</i>    | 64   | 9  | 9  | 0  | 0.0123 |
|          | Capnodiales                    | <i>Cercospora</i>        | 885  | 9  | 9  | 0  | 0.0394 |
|          | O_unclassified_p_Glomeromycota | unclassified             | 293  | 9  | 9  | 0  | 0.0008 |
|          | Pleosporales                   | <i>Phaeosphaeria</i>     | 252  | 9  | 9  | 0  | 0.0018 |
|          | Pleosporales                   | <i>Setophaeosphaeria</i> | 788  | 8  | 8  | 0  | 0.0042 |
|          | Chaetothyriales                | unclassified             | 397  | 8  | 8  | 0  | 0.0066 |

Note: The degrees are characterized by fungal connections, where +/- indicates positive or negative correlation. Abundance describes the number of OTUs in a group as a proportion of all OTUs (e.g., Abundance OTU301% = (OTU301 of abundance/abundance of fungal OTU on the root) × 100).
